# Supplementary material
Source: publisher figshare collection journal article supplement (https://brill.figshare.com/ndownloader/files/26179895)
Supplement: Supplementary file 1 [file 26179895]

xread
86 87
Elaphrothrips	1102[1 2][0 1]10010012[0 1]13111100001001100[0 1]112101011020100210[0 1]050010[0 1]1[0 1]201000---00-010000-111011
Adraneothrips	12122[0 1]00000110023[1 2]111010001010110112000000[0 1]00100101104001010-00000101000-000000-0-1010
Alocothrips	[0 1][0 1]100[0 1]0000010000220-10100?00101101120000011-1010210013001011000011102000-1101011101011
Amynothrips	11011011010[0 1]0201310-1010011010110112100011010100011012101011001000102000-000-010100000
Androthrips	1100[0 2]11101100002321110100110111101121000010111100011001010110010[0 1]00---00-111001010111[0 1]
Arrhenothrips	1100011101110000221110101[0 2]001[1 2]0101120000111-0110[0 2]10112101011001000102000-1101011111001
Austrothrips	11000111000101002110101001001211011[1 2]00000101011000001[2 3]11101100??11?????0-1?0000-??1?11
Ayyarothrips	11000[0 1]1[0 1]011102002[1 2]101000010?11000110000011??0110210100001001000?00???????000000-0-1001
Crotonothrips	1100010000110200221010[0 1]000101200011200001101011021001[0 2]101001001000102000-11000101110[0 1]1
Euoplothrips	11022[0 1]1101111002320-10100100101101121000011-0110001100101010-210000---00-1111011111110
Gynaikothrips	1100001101100000221111[0 1]00000120[0 1][0 1]11[0 1]0001110201[1 3]1210002101111001000102000?000000-0-1011
Haplothrips	11011010010002013211101001111[0 1]1101121000011-0100001[0 1]001210110010[0 1][0 1]0---00-01000??100110
Hoplandrothrips	110[0 2]2[0 1]11000100023010101012[1 2]01[0 1]1101120000011-0100[0 2]00013101011001000100000-11[0 1]0010101011
Kladothrips	[1 2][0 1 2][0 1]000[0 1][0 1]01100000230-0--0021110-101120000011-111001001[0 2]1010110000110---00-1101111111011
Leptothrips	110[0 2]2[0 1]1001001010221110000??01[0 1]0101121000011-01202001001010110010000---00-000000-0-0111
Liophloeothrips	01000[0 1]1101100000221[0 1]10100210121101120000?11-011021001[2 3]10101100101[0 1]102000-1100010101010
Liothrips	11002[0 1]1[0 1]01[0 1]0121022111010001011[0 1][0 1]0112000011010100[0 2]1001[0 1]1010[0 1]1001000102000-000000-0-1011
Mesothrips	1100211101100002221110000100110001121000111-01[0 1]02011?01110[0 1]10210000---00-11000111011[0 1]1
Mirothrips	1102[1 2]0?1000000022111101001[0 1]012110112100001011100011102101011000010100000-000000-0-1010
Myrciathrips	1100[0 2]11[0 1]0100000131111010000010-101121000010[0 2]01000010011010110[0 1]1000101000-1100011101000
Phlaeothrips	110[0 2]2[0 1]111-1100023110101012101[1 2]1101120000011-010001001[2 3]1010110[0 1]10110---00-1100010101011
Phorinothrips	1100011100000000221110100000111101120000011-11[1 3]101001210101100??00?????0-1?00010??1011
Pistillothrips	1110001101100002220-10100210111121120000011-111101001400111101??11?????121?01011???011
Pristothrips	1101101101010202320-101002[0 1]010110112000001[0 1]21[0 1]00[0 2]1011[0 2]101011021?00102000-1111?11111011
Pseudophilothrips	11000[0 1]1101100210211110[0 1]002100111[1 2]112000011[0 1]1011021001[0 1]1010111000[0 1][0 1]102000-000000-0-1011
Vuilletia	11000[0 1]11010000001[0 1]11101002211211[0 1 2]010000010--01000100151010110001110---00-110000-0-0011
Plagiothrips_eugeniae	1100[0 1]01101111?02211110000[0 2][1 2]110010010000011021111?0011010101101??00?????121?00?10??1011
Mixothrips_craigheadi	1100011101010001121?1?000000110001100000110211102100121010010000000---012110010-0-1001
Mixothrips_nakaharai	10000100010100022111100000[0 1]11100201000001102111020[0 1]1121000010000000---012110010-0-1001
Johansenthrips_galligena	110210110101000[0 1 2][1 2]20-110000[0 1]01000[1 2]11200001?1-11100101101010010101000----111100111111001
Jersonithrips_galligenus	110000001-01120112101000011112110110100011021111200001111010-1011111400???0000??0-1011
Fourbethrips_fiorella	11000[0 1]1101100201220-10100[0 2]011101001000001102111020111312-011011?11?????111?0010-0-10[0 1]1
Holopothrips_ananasi	110001111-10000122101011022012112110100111021101010013101010-100111141012000000-0-1011
Holopothrips_carolinae	20120000000000011111000000?1101101000000110211[0 1]120001[0 1 2]111110-1??10?????100?0000-??001?
Holopothrips_chaconi	10000000010002011211100002[1 2]0010021020100110211112101100010[0 1]0-100001141012000000-0-10[0 1]1
Holopothrips_claritibialis	11000011?0010[0 2]022211101000[0 1]01111010001[0 1]0110211[0 1]120[0 1]01[0 2]111010-100001041012000000-0-1011
Holopothrips_conducans	110[0 2][0 2]111011100022[2 3]1110[0 1]00[0 2][1 2]001[0 1][0 1]211[0 1]0000010211100[0 1]101[0 2]100[0 1]010100001130010000000-0-10[0 1]1
Holopothrips_erianthi	11?00[0 1]11011112122[1 2]111010002?10110110??000???1120200??01010?1??0?1111420??00???0-0-10??
Holopothrips_ferrisi	110000????????0??211100?021??2110110??011???1111200??0101?1101????10411???????????????
Holopothrips_fulvus	2012010000000[0 2]0222110--00011101101100?0011021[0 1]00210010111010-101101140012000000-0-1010
Holopothrips_graminis	11000111011002011111100000[0 1]1100001100100[0 1]1021130210010111010-1??000---?100?0000-??1011
Holopothrips_hambletoni	110000111-00000221111010001010110110001011021100110110101010-1001010421???0000??0-1010
Holopothrips_hilaris	11100011011002022[0 1]11101000211101011000[0 1]101021131201010111110-1??001?41?110?0000-??1011
Holopothrips_inquilinus	2012010000001002221110100[0 2]?0011111100?00110[1 2]1110210010101?1101??101?41???0?0000-??1011
Holopothrips_inversus	110000110111020222111010001111110110[0 1]001110111312101101101110100111[0 1]411???00000-0-1010
Holopothrips_jaboticabae	11000110010100022210101001001011001000001001111121111[2 3]1011110[0 1]??11?????121?0000-??1011
Holopothrips_mariae	110001110111000112111010010?1111[0 2]1101001[0 1]1021111210010101010-100001142012000000-0-1011
Holopothrips_molzi	1100011101100001121110000100110121100000010211100000121010[0 1]1110?000---010110000-0-1011
Holopothrips_oaxacensis	11000110011???122111101?021?111101?0??0?????113?2????0101011?1?0001041????????????101?
Holopothrips_omercooperi	1100[0 2]11101110?02211110[0 1]0010011110110000001021121200111101011[0 1]1000011400100?0000-0-1011
Holopothrips_orites	110001110110021222111000021001110110000111021121[1 2]0001010011101??00?????120?0000-??1011
Holopothrips_paulus	1212000000001002211110100010101101?0??10?1??11100001101?1010-100[0 1]01141110000000-0-101?
Holopothrips_pennatus	1100000000000202211110100[0 2]1110110110001011021100100010110010-1??10?????120?0000-??1011
Holopothrips_permagnus	11002[0 1]1001100202121110[0 1]002101111001[1 2]0001110211312101121010[0 1]101??001?41?110?0000-??1011
Holopothrips_pictus	111001110111020221111010001011110[0 1]10001101021111110100101110-1??111?42?120?0000-??1011
Holopothrips_porrosati	12120000[0 1]000100223111001001112010100000011??1110?0101?1?101??100101010011000000-0-1011
Holopothrips_signatus	1110001101110202211110000010111101100001[0 1]10211112100001?1010-100111143012000000-0-1011
Holopothrips_stannardi	1100011101110202211110000010100001100000[0 1]10211212000101010010100001010111000000-0-1001
Holopothrips_striatus	110[0 2]2[0 1]1101?00012221110[0 1]00[0 2]001011001000000102112111011[0 1 2]100111[0 1]100001141011000000-0-1011
Holopothrips_tabebuia	11100000000000022211101000101[0 2]11011000[0 1]0[0 1]10211[2 3]0?10112101010-100111041110000000-0-1011
Holopothrips_tenuis	110[0 2]00100110000222111010001001-11110010111021131210010100110-1??101?41?100?0000-??1011
Holopothrips_tillandsiae	110001100110?201110-1[0 1]10021111[0 1][0 1]21100?001102110021000[0 1]1[0 1]1010-[0 1]01000---?11000000-0-1010
Holopothrips_tupi	1100011001100212221110100010111101100?0101021111200011101111010?001?40?100?0000-??1011
Holopothrips_johanseni	11000111??111202211?11100010111100100001[0 1]102111110[0 1]10[0 1]1?1010-1001[0 1]1142012000000-0-1011
Holopothrips_graziae	201[0 2]0100?000100221??1010001110-1011000000102110020[0 1]010101010-1001[0 1]1041110000000-0-1010
Holopothrips_punctatus	1100001101100[0 2]022211101101011011[0 1]111001011021100210010110010-100[0 1]01042112000000-0-1011
Holopothrips_spermathecus	1100011101110202221110100010011101110000010211112[0 1]001210101101??00?????120?0000-??1011
Holopothrips_inconspicuus	1100010000010002220-101001001011[0 1][0 1]1000--110210-021101[1 2 3]1110110[0 1]00110---012000000-0-1011
Holopothrips_longisetus	11000111010000011[1 2]111[0 1]000[0 1]000[1 2]1121100000110211112011011210110[0 1]0?000---011110010-0?10[0 1]1
Holopothrips_varicolor	11000100000000022211101000[1 2]01011001[0 1][0 1]000010211102100121010110[0 1]00111143012110000-0-1011
Holopothrips_atlanticus	11000111010002122211100001[0 1]0?00[0 1]211000000102112121011[0 2]1001010100001140010110000-0-1011
Holopothrips_magnus	1100011101000002221110000100110021101000010211212001121001[0 1]11100001130010110000-0-??[0 1]1
Holopothrips_reticulatus	11000[0 1]1[0 1]011002022211100101111211[0 1]1[0 1]000010102111121001[0 2]101110-100111142010000000-0-1011
Holopothrips_bicolor	101[0 2]0[0 1]0000000002221110010[0 1]111111[0 1]1100010010211[0 1]021001[1 2]111110-100111142012000000-0-1011
Holopothrips_maiae	1102[1 2]01101100002221110100[0 1]10101101100000110211212101101010[0 1]10100001141011110000-0-1011
Holopothrips_kaminskii	110000110100000[1 2]22111[0 1]100[0 1]0?11-1011[0 1]001111021121210[0 1]13101011[0 1]100000---011110000-0-1011
Holopothrips_nigrum	110[0 2][0 2][0 1]11010002122[1 2]111001021002[0 1]0211?0000[0 1]10211212001101001011[1 2]00001110010000000-0-10[0 1]1
Holopothrips_longihamus	11000[0 1]1101010002221110100100111101100000[0 1]10211102001121?101101000011[1 3]1012110010-0-1011
Holopothrips_singularis	110000111-11100223100--10011121101100[0 1][0 1]1110211112100?0111010-100001143011000000-0-1011
Holopothrips_nigrisetis	1100011001100212221110[0 1]0010010012[0 1]1000001102112120001210?1010100001141011000000-?-1001
Holopothrips_acrioris	1100011101100002221110000[0 2]10010021100000010211[0 1]001001[0 2]1010011100001130010000000-0-1001
Holopothrips_cardosoi	110[0 2]2[0 1]1101?10202221110100220011[0 1]211000000102111021011210?0111100001111011000000-0-1011
Holopothrips_curiosus	110221100100000222111000010010[0 1][0 1]00100000010211[1 2]11101101010[0 1]10[0 1]00001141010000000-0-1011
Holopothrips_infestans	1100011101010002221110100[0 2]1001[0 1]100100000010211[0 1]02100121010[0 1]10000001130011110000-0-1011
Holopothrips_flavisetis	1100?[0 1]-001[0 1]10201[1 2]211101002[1 2]0001101100000110211102100121010110000111030012110000-0-1011
Holopothrips_irregularis	1100011101100001121110[0 1]001011101[0 1]1100000110111112101101010110100001000012110000-0-1011
Holopothrips_brevicapitatum	1100[0 2][0 1]1101110002221110[0 1]00100100101100000110211202001101010[0 1]101000011440121100?0-0-10[0 1]1
;
xinact;
hold 90000;
proc /;
